32 regenerate once damaged, lung conditions such as chronic obstructive pulmonary disease  
33 (COPD), the third leading cause of death in the world, are progressive and incurable<sup>1</sup>.  
34 Although the only fundamental treatment for COPD or end-stage lung disease is lung  
35 transplantation, donor shortage is a critical limitation<sup>2</sup>. To overcome this problem,  
36 biological artificial lungs have been created *in vitro* using a decellularized matrix scaffold.  
37 Decellularized lungs filled with endogenous lung epithelial cells have been successfully  
38 transplanted with a life of a few hours, but are yet to offer a long-term solution<sup>3, 4</sup>. Lung  
39 epithelial cells differentiated from human induced pluripotent stem cells (iPSCs) can  
40 repopulate into the required scaffold<sup>5</sup>, but to generate a human-scale lung, applying xeno-  
41 organs which contain different species as scaffolds has immunological problems<sup>6</sup>.

42 The lungs develop from epithelial tissue derived from the foregut endoderm, and  
43 from mesenchymal tissue derived from the visceral mesoderm. At E9.5, the lung bud  
44 bifurcates anteriorly from the ventral foregut endoderm into the mesenchymal tissue<sup>7</sup>. By  
45 E16.5, the basic structures of the lung are formed, including airways and terminal bronchi.  
46 The epithelium produces basal, ciliated, secretory, and neuroendocrine cells, while the  
47 mesenchyme produces smooth muscle, chondrocytes, vascular endothelial cells, and  
48 lymphocytes. Next, in E16.5-E17.5, the surrounding mesenchyme become thinner and  
49 capillary vessels are actively formed. At this time, type I and II alveolar epithelial cells,  
50 and lipofibroblasts arise. In the terminal cyst stage (E17.5-P5), alveolar sacs are formed,  
51 surfactant protein production begins, and capillaries develop<sup>8</sup>.

52 Fibroblast growth factor 10 (Fgf10), which is essential for lung bud elongation, is  
53 secreted by the mesenchyme surrounding epithelial tissue<sup>9, 10</sup>, and its signal is accepted  
54 by fibroblast growth factor receptor 2 isoform IIIb (Fgfr2b) in the lung epithelium<sup>11</sup>. The  
55 interaction of Fgf10 and Fgfr2b is critical for lung development, and both Fgf10 knockout  
56 (KO) and Fgfr2b-KO mice showed lung agenesis in previous studies<sup>9, 12</sup>.

57 To solve the problem of organ shortage, attempts have been made to create donor  
58 organs from pluripotent stem cells (PSCs) in the animal body through a process called  
59 blastocyst complementation<sup>13-22</sup>. In this method, PSCs such as iPSCs and embryonic stem  
60 cells (ESCs) are injected into fertilized eggs of an organ-deficient model. These PSCs can  
61 compensate for the defective organs, and PSC-derived organs are created in the body of  
62 the resulting chimeric animal. Using this method, transplantable pancreases and thymuses  
63 have been successfully produced in interspecies chimeras using mice and rats<sup>13, 14</sup>. PSC-  
64 derived kidneys were also generated in interspecies chimeras using mouse PSCs in a rat  
65 kidney deficient model, but this process was not successful for rat PSCs in a mouse  
66 model<sup>15, 16</sup>. Functional lungs have been produced in intraspecies chimeras using the  
67 Fgf10-KO or Fgfr2b-KO mouse models with mouse PSCs, but are yet to be observed in

68 an interspecies chimera<sup>17, 18</sup>. This suggests that the combination of blastocyst and PSC  
69 species may be critical, but the exact requirements for successful organogenesis by  
70 blastocyst complementation are not yet known. Furthermore, resulting organs are often  
71 only partially PSC-derived, even if the model organism exhibits organ-deficient gene  
72 dysfunction<sup>15-18</sup>. Therefore, the evaluation of the organ-deficient model is important for  
73 generating fully PSC-derived organs and for the realization of future regenerative  
74 medicine applications.

75 This study aimed to examine the organ-deficient model through a “reverse blastocyst  
76 complementation method,” which involves the injection of mutant ESCs into wild-type  
77 (WT) embryos. The method allows us to efficiently detect mutant cells in the organ and  
78 to clarify the conditions for successful lung formation in blastocyst complementation. We  
79 achieved lung formation by rat cell complementation in a *Fgfr2b*-KO mouse model  
80 without establishing mouse lines using a tetraploid-based organ-complementation  
81 method. The rat cells in the generated lungs unexpectedly retained their developmental  
82 timing in the mouse body.

83

## 84 **Results**

### 85 **The *Fgfr2b*-KO model was appropriate for organ-complementation of lung** 86 **epithelium**

87 For a reverse blastocyst complementation system (Fig. 1a), we used mutant ESCs  
88 constitutively expressing Su9-DsRed2 (RFP), such that the contribution of mutant cells  
89 in the chimera was easily detected. In E14.5 allogeneic chimeric fetuses, RFP-expressing  
90 ESC-derived cells were found to have similar contribution rates in various tissues and  
91 organs (Supplementary Fig. 1). Therefore, we conducted flow cytometry analysis to  
92 estimate the contribution of ESCs to the body tissues of the chimeras based on the  
93 percentage of cells that expressed RFP fluorescence.

94 We designed gRNAs on either side of exon1 on the *Fgf10* gene, which contains a start  
95 codon, and established the *Fgf10*-KO ESC lines (Supplementary Fig. 2a, b). We also  
96 designed two gRNAs to remove the IgIIIb domain of *Fgfr2* and generate *Fgfr2b*-KO ESC  
97 lines (Supplementary Fig. 3a, b). Two ESC lines for *Fgf10*-KO or *Fgfr2b*-KO, which have  
98 different mutations, were used to produce chimeras (Supplementary Fig. 2c, 3c).  
99 Chimeric embryos were generated by injecting *Fgf10*-KO or *Fgfr2b*-KO ESCs into E2.5  
100 stage of WT embryos, which were dissected at E14.5 (Table 1, 2). *Fgf10*-KO chimeras  
101 with over 90.7% contribution of *Fgf10*-KO cells exhibited defects in lung and limb  
102 formation (Fig. 1b, c). However, limb and lung defects were not observed in chimeras

103 with more than 14.7% contribution of WT cells (Fig. 1b, c). These results suggest that a  
104 certain amount of cells expressing Fgf10 as WT cells is required for lung formation.  
105 Similar to the Fgf10-KO chimeras, Fgfr2b-KO chimeras with less than 3.8% WT cell  
106 contribution showed defects in the lungs and forelimbs (Fig. 1b, c). Unlike the Fgfr2b-  
107 KO phenotype described in a previous study (12), hindlimb defects were not observed in  
108 our model. Forelimbs and lungs were observed in chimeras with a WT cell contribution  
109 of more than 9.8% (Fig. 1b, c), indicating that proper forelimb and lung development was  
110 enabled by 10% contribution of WT cells derived from fertilized eggs.

111 Next, RFP + cells derived from mutant ESCs and RFP – cells derived from WT  
112 embryos were sorted from chimeric lungs at E14.5, and the *Acta2* and *E-Cad* expression  
113 was examined. *Acta2*, which is expressed in smooth muscle cells that are differentiated  
114 from the lung mesenchyme, was detected in the RFP + group of Fgf10-KO and Fgfr2b-  
115 KO derived cells (Fig. 1d, e). This indicated that Fgf10-KO and Fgfr2b-KO cells could  
116 differentiate into smooth muscle cells. *E-Cad*, which is expressed in lung epithelial cells,  
117 was also detected in the RFP + group of Fgf10-KO derived cells but not in that of Fgfr2b-  
118 KO derived cells (Fig. 1d, e). This suggests that Fgfr2b-KO cells did not contribute to the  
119 lung epithelium. To further investigate, sections of Fgf10-KO and WT chimeric lungs  
120 were immunostained for mesenchymal cell-derived tissues, such as smooth muscle or  
121 vasculature with smooth muscle actin (SMA), or for endomucin antibody, respectively.  
122 Fgf10-KO and Fgfr2b-KO cells contributed to the smooth muscle and vasculature cells  
123 (Fig. 1f). We also immunostained the epithelial tissues using antibodies against E-  
124 cadherin. Fgf10-KO cells contributed to the lung epithelium (number of lung epithelial  
125 ducts without Fgf10-KO cells = 0/16; Fig. 1g). These results indicated that the Fgf10-KO  
126 animal model did not provide any organ niches in the lungs for WT cell compensation. In  
127 contrast, Fgfr2b-KO cells did not contribute greatly to lung epithelial cells (number of  
128 lung epithelial tubules without Fgfr2b-KO cells = 77/81). However, even in the four cases  
129 of lung epithelial ducts to which Fgfr2b-KO cells contributed, only a few Fgfr2b-KO cells  
130 were identified (Fig. 1g). These results show that the Fgfr2b-KO animal model provided  
131 an organ niche for lung epithelial tissues, and only 10% contribution of WT cells was  
132 necessary for proper lung formation.

133

#### 134 **Mouse ESCs promoted lung formation in Fgfr2b-KO mouse model via a tetraploid-** 135 **based organ-complementation method**

136 Since conventional blastocyst complementation method is time-consuming, we next  
137 generated mutant and WT chimeras from two types of ESCs (mouse Fgfr2b-KO and WT)  
138 using the tetraploid-based organ-complementation method<sup>23</sup>. We first injected RFP-

139 expressing mouse *Fgfr2b*-KO ESCs into tetraploid embryos at the E2.5 stage, followed  
140 by GFP-expressing mouse WT (G-mWT) ESCs injected at the E3.5 stage (Fig. 2a). After  
141 transplantation of the chimeric embryos, we obtained E14.5 chimeric fetuses (n=2; Table  
142 3). Similar to the chimeras obtained using the reverse-blastocyst complementation  
143 method, defects in the forelimbs and lung epithelium were complemented by cells derived  
144 from G-mWT-ESCs (Fig. 2b). We examined whether the lung epithelium was  
145 complemented with G-mWT-ESCs by immunostaining with an E-cadherin antibody. In  
146 the chimeric lungs, the epithelial tissue was found to be complemented by GFP-  
147 expressing cells (n=12/12) (Fig. 2c). To address whether the resulting lung was functional  
148 after birth, we performed a caesarean section at E19.5, and obtained two chimeras (Table  
149 3). Both chimeras showed a normal appearance, but the non-chimeras that did without  
150 GFP signal showed cyanotic skin color (Fig. 2d). Although lungs were not present in the  
151 non-chimera, as expected, GFP-expressing lungs were present in chimeras (Fig. 2e,  
152 Supplementary Fig. S4). This indicates that the mouse WT ESCs were able to correct the  
153 lung epithelium defect in the *Fgfr2b*-KO model through tetraploid-based organ  
154 complementation.

155

### 156 **Rat ESCs promoted lung formation in *Fgfr2b*-KO mouse model using a tetraploid-** 157 **based organ-complementation method**

158 Since the mouse WT ESCs ameliorated the lung epithelial defect in *Fgfr2b*-KO mice,  
159 we next examined whether rat lungs could be formed in the *Fgfr2b*-KO lung deficient  
160 mouse model using tetraploid-based organ-complementation. When GFP-expressing rat  
161 WT (G-rWT) ESCs were injected into WT mouse fertilized eggs, rat cells contributed  
162 unevenly to the embryos depending on the organ in the resulting a mouse-rat interspecies  
163 chimera. Notably, rat cells contributed more to the lungs than other to organs, whereas G-  
164 mWT ESC-derived cells uniformly contributed to each organ<sup>24</sup> (Supplementary Fig. 5a-  
165 5c). Therefore, we hypothesized that the lung epithelial defect of mouse *Fgfr2b*-KO mice  
166 could be complemented by rat cells. We injected RFP-expressing mouse *Fgfr2b*-KO  
167 ESCs into tetraploid embryos at the E2.5 stage, followed by G-rWT-ESCs injected at the  
168 E3.5 stage (Fig. 3a). At E14.5, we observed successful lung formation in the interspecies  
169 chimeric fetuses (Fig. 3b) (n=3; Table 4). This indicated that the defective lung  
170 phenotypes from *Fgfr2b*-KO mice could be recovered with rat cells, although the obtained  
171 lungs were relatively small compared to those resulting from mouse WT cells (Fig. 3b,  
172 Supplementary Fig 6a vs Fig. 2b). We also confirmed that most of the tubular structures  
173 that appeared to be epithelial tissue in interspecies chimeric lungs were complemented by  
174 rat cells (n= 12/13) (Fig. 3c and Supplementary Fig. 6b). To examine whether the lung

175 rescued by rat WT cells was functional after birth, we performed a caesarean section at  
176 E19.5, and obtained two chimeras (Table 4). However, both pups with GFP fluorescence  
177 (rat chimera) showed cyanotic skin color similar to the pups that did not show GFP signal  
178 (non-chimera) (Fig. 3d). The non-chimera pups died within 21 min, on average, due to  
179 respiratory failure, whereas the Fgfr2b-KO chimeras with G-mWT cells survived for  
180 more than 5 h (Fig. 3e). The rat chimeras showed postnatal mortality within 10 min to 15  
181 min (Fig. 3e), even though exhibited GFP-expressing lungs (Fig. 3f and Supplementary  
182 Fig. 7). These results showed that rat WT ESCs did promote lung epithelial development  
183 in the Fgfr2b-KO mouse model with tetraploid-based organ-complementation method,  
184 but the generated lungs were not functional after birth.

185

### 186 **Lung epithelium formed by rat ESCs preserved intrinsic developmental time in the** 187 **Fgfr2b-KO mouse model**

188 Since the morphology of the lungs in the rat chimera was not the same as that in the  
189 mouse chimera for the Fgfr2b-KO model (Fig. 2e vs Fig. 3f), we further analyzed the  
190 generated lungs. Histology of lungs composed of Fgfr2b-KO and G-mWT cells revealed  
191 normal saccular expansion and septal thinning, similar to that of the mouse WT control,  
192 suggesting that the G-mWT-ESCs could fully compensate for the lung dysfunction in the  
193 Fgfr2b-KO model. In contrast, histological analysis revealed that lungs from Fgfr2b-KO  
194 and G-rWT cells showed abnormal alveolar expansion with smaller airspaces and much  
195 smaller alveoli, indicating that lung development was delayed compared to the  
196 intraspecies model, or that no surfactant protein was secreted and the lungs failed to  
197 inflate with air (Fig. 4a, b). To examine whether the histological abnormality of the lung  
198 from Fgfr2b-KO and G-rWT chimeras was from dissection timing, we dissected mouse  
199 WT control or mouse WT and G-rWT interspecies chimeras at 10 min after caesarean  
200 section. However, we did not observe a difference in air space between the WT mouse  
201 and the G-rWT interspecies chimera (Fig. 4a). This suggested that the abnormality of the  
202 lung from Fgfr2b-KO and G-rWT chimeras was not due to dissection timing. Since rat  
203 development is slower than mouse development, we further investigated the immaturity  
204 of the lungs of the Fgfr2b-KO and rWT chimeras. We immunostained for the SRY-box  
205 containing gene 9 (Sox9), a marker of lung distal epithelial progenitor cells. Sox9 is  
206 mainly expressed in the epithelial progenitor cells from E11.5–E16.5, and is hardly  
207 detectable by E18.5<sup>25, 26</sup>. We could not detect Sox9 positive progenitor cells in the lungs  
208 of Fgfr2b-KO and G-mWT chimeras (Fig. 4c). However, in the lungs of Fgfr2b-KO and  
209 G-rWT chimeras, numerous Sox9 positive progenitor cells were detected in the epithelial  
210 tubules (Fig. 4c). We also could not detect Sox9 positive progenitor cells in the lungs of



211 the mouse WT control or the mouse WT and G-rWT interspecies chimera dissected 10  
212 min after caesarean section, even though the GFP-expressing rat cells were highly  
213 populated in the lungs (Supplementary Fig. 8a, b). In the lungs of mouse WT and G-rWT  
214 interspecies chimeras, we found that GFP-expressing rat cells were almost not observed  
215 in the lung epithelium (Supplementary Fig. 8b). *Sftpc* mRNA, which is expressed in  
216 mature AT2 differentiated from lung epithelial progenitor, was not detected or present in  
217 low levels in some lung lobes of the mouse WT and G-rWT interspecies chimeras  
218 (Supplementary Fig. 8c, d). These results indicated that rat cells were likely to be  
219 eliminated from lung epithelial tissue when mouse WT cells were present. Together, the  
220 *Fgfr2b*-KO and rat WT chimeras could not breathe after birth, likely because rat lung  
221 epithelial cells preserved their own developmental timing even in the mouse body.

222

## 223 Discussion

224 The production of organs by blastocyst complementation has been highlighted as one of  
225 the most promising regenerative medicine platforms. One of the remaining problems is  
226 the lack of knowledge regarding successful production of PSC-derived organs. In this  
227 study, we applied a reverse-blastocyst complementation method to evaluate an organ-  
228 deficient model for the production of lungs by blastocyst complementation, establishing  
229 an important benchmark that will allow us to evaluate whether a given organ-deficient  
230 model can provide an appropriate organ niche. Consequently, we clarified the success  
231 conditions for generating lungs through the blastocyst complementation method and  
232 achieved the production of lungs with rat cells in a mouse lung-deficient model.

233 Here, we demonstrate the effectiveness of the reverse-blastocyst complementation  
234 method. Reverse-blastocyst complementation has been applied in previous studies to  
235 analyze whether the abnormalities caused by gene knockout in mutant embryos are  
236 intrinsic defects due to their gene functions (cell-autonomous) or extrinsic defects due to  
237 the surrounding microenvironment (cell non-autonomous)<sup>27-30</sup>. Compared to the  
238 blastocyst complementation method, the reverse-blastocyst complementation method  
239 provides several advantages for evaluating organ-deficient animals. First, the analysis of  
240 organ deficient-WT chimera embryos in the blastocyst complementation method was  
241 time-consuming and inefficient because it required the establishment of a genetically  
242 modified heterozygous mouse line, as well crossing to obtain even single gene deficient  
243 embryos, which appears in only one in four. In the reverse-blastocyst complementation  
244 method, only mutant PSCs need to be established to analyze organ deficient-WT chimeras,  
245 and organ deficient-WT chimeras can be obtained from all embryos injected with mutant

246 PSCs. In addition, using CRISPR-Cas9 technology, it is possible to obtain mutant PSCs  
247 with high efficiency<sup>31</sup>. Second, in blastocyst complementation, if the gene plays a pivotal  
248 role in extraembryonic tissue, injected PSCs cannot compensate for the abnormality.  
249 Since PSCs only differentiate into a given embryonic lineage, the abnormality from gene  
250 mutation occurs only in the embryonic tissue in reverse-blastocyst complementation.  
251 Third, in the blastocyst complementation method, injected PSCs usually express  
252 fluorescent proteins<sup>17,18</sup>, so their distribution in the tissue can be easily tracked. However,  
253 if the contribution of PSC-derived cells is high, it is difficult to determine the contribution  
254 of mutant-derived cells in the tissue<sup>15-18</sup>. In contrast, with the reverse-blastocyst  
255 complementation method, the distribution of mutant PSC-derived cells in the tissue can  
256 be readily ascertained, even if the mutant cell contribution is low.

257 We investigated the lungs of *Fgf10*-KO or *Fgfr2b*-KO and WT chimeras using the  
258 reverse-blastocyst complementation method. Recently, Kitahara et al.<sup>17</sup> generated lungs  
259 in an *Fgf10*-KO mouse model using blastocyst complementation. Consistent with our  
260 results, they showed that *Fgf10*-KO cells were included in most cell types in the lungs.  
261 However, they observed that WT PSC-derived cells were primarily detected in the  
262 epithelial cells of the generated lungs, which we did not observe. Since *Fgf10* signaling  
263 regulates differentiation into lipofibroblasts in the lung mesenchyme, which appear from  
264 E15.5<sup>32</sup>, *Fgf10*-KO cells may be able to change their distribution in the lungs after the  
265 E15.5 stage. Mori et al.<sup>18</sup> also showed that mouse PSCs could generate functional lungs  
266 in an *Fgfr2* conditional KO model through the blastocyst complementation method, and  
267 the epithelial tissues of generated lungs were highly populated by PSC-derived cells  
268 compared to lung mesenchyme tissue. Consistent with their results, we observed that  
269 *Fgfr2b*-KO cells could not contribute to the lung epithelium through the reverse-  
270 blastocyst complementation method. In summary, we were able to demonstrate the  
271 feasibility of the reverse-blastocyst complementation method to evaluate the contribution  
272 of WT cells to organs without generating organ-deficient mice.

273 Since we realized that mouse WT cells contributed fairly evenly to all tissues in E14.5  
274 embryos, we could roughly estimate chimerism in the target organs of the organ-deficient  
275 model. Based on this estimation, the presence of a certain number of normal cells was  
276 necessary to overcome the phenotype of lung agenesis in *Fgf10*-KO or *Fgfr2b*-KO models.  
277 If the presence of a certain number of normal cells is also important for the formation of  
278 kidney, then rat cells might not be able to rescue the mouse kidney agenesis model<sup>16</sup>,  
279 because we realized that rat cells cannot contribute much to the mouse kidney in this  
280 study. In the future, we will need insight into the percentage of WT cells required to  
281 produce the organs of each tissue using the reverse-blastocyst complementation method.



282 We applied a tetraploid-based organ-complementation method, which also allows the  
283 production of WT-PSC -and KO-PSC-derived chimeras without generating mouse lines,  
284 to produce rat lungs in the Fgfr2b-KO mouse model. While higher WT contribution in  
285 the defective organ is expected to be one of the critical factors when interspecies chimeras  
286 are produced for organ generation<sup>33</sup>, we and others<sup>24</sup> found that rat PSCs were likely to  
287 contribute to mouse lung tissue. In addition, we realized that few WT-derived cells were  
288 required to prevent lung agenesis in the Fgfr2b-KO model in this study. Indeed, we  
289 succeeded in overcoming the lung defect in Fgfr2-KO mice with rat PSCs through the  
290 tetraploid complementation method. The size of all three lungs complemented by rat  
291 PSCs was smaller than that of lungs complemented by mouse PSCs at E14.5. In particular,  
292 the lung size was smallest in Fgfr2b-KO and rat WT chimeras, with the lowest percent  
293 contribution from rat cells. Since lung size is determined by the number of lung epithelial  
294 progenitor cells<sup>34</sup>, this may indicate that lung size is also determined by the number of rat  
295 lung epithelial progenitor cells in interspecies chimera.

296 Intriguingly, in one of the resulting rat lungs at postnatal stage (Fig. 3f, chimera #1),  
297 the rat epithelial progenitor cells remained immature, even if the lung was composed  
298 almost entirely of rat cells. This result suggests that rat lung epithelial cells retain their  
299 own developmental speed despite their presence in a different species, or that rat lung  
300 mesenchymal cells, including lung epithelial cells, are delayed compared to mouse  
301 development. In another example (Fig. 3f, chimera #2), rat lung epithelial cells were still  
302 in an immature state, even though most of the mesenchymal cells were mouse cells. This  
303 result raises the possibility that rat epithelial cells are unable to receive signals from  
304 mouse mesenchymal cells. Similar to this observation, rat germ cells, even when present  
305 in mouse testes, have been shown to differentiate at the time typical for rats and therefore  
306 generate the structural pattern of rat spermatogenesis<sup>35</sup>. This suggests that some cells  
307 exhibit intrinsic regulation of differentiation, even in interspecies environments.  
308 Therefore, the generation of functional lungs in interspecies chimeras may require  
309 overcoming the barrier of species-specific intrinsic developmental timing.

310 There are also some limitations in our study. Although rat lungs were formed in the  
311 Fgfr2b-KO mouse model, they were not functional after birth because the rat lung  
312 epithelial tissue was still in the prenatal stage. Balancing the proliferation and  
313 differentiation of lung epithelial progenitor cells requires fine control of Sox9 expression  
314 levels<sup>36</sup>. Thus, modulation of Sox9 may be important for generating functional lung in  
315 interspecies blastocyst complementation. Sox9 expression is regulated by Nmyc or Asxl1  
316 <sup>26, 37</sup>. Therefore, it may be important to modulate the expression of Nmyc or Asxl1 to  
317 regulate the intrinsic developmental timing of lung epithelial progenitor cells. In addition

318 to Sox9, Creb1, Grhl2, Carm1, and Foxm1 are also required for appropriate alveolar  
319 formation and development during fetal lung development<sup>38-41</sup>. In the future, it may be  
320 necessary to determine the factors which is related to the intrinsic developmental timing  
321 of lung epithelial progenitor cells in xenogeneic lung. Moreover, future studies comparing  
322 species with different developmental speeds other than the mouse-rat combination would  
323 be useful to better understand species-specific developmental time.

324 In summary, our analysis provides evidence that the Fgfr2b-KO demonstrate lung  
325 epithelial deficient model by reverse-blastocyst complementation method. With the  
326 model, we propose that rat ESCs potentiate the ability to rescue the lung agenesis in  
327 mouse. Furthermore, our findings point to regard for species-specific developmental  
328 timing is a key point for generating functional lung in interspecies blastocyst  
329 complementation.

330

331

## 332 **Methods**

### 333 **Animals**

334 All animal experiments were conducted in accordance with the guidelines of  
335 “Regulations and By-Laws of Animal Experimentation at the Nara Institute for Science  
336 and Technology” and were approved by the Animal Experimental Committee at the Nara  
337 Institute of Science and Technology (approval nos. 1639 and 2109). The animal  
338 experiments in this study were performed in compliance with ARRIVE guidelines<sup>42</sup>. ICR  
339 mice were purchased from Japan SLC, Inc.

340

### 341 **Collection of eggs**

342 ICR females aged 8-10 weeks were treated with CARD HyperOva (Kyudo) and hCG  
343 (ASKA Animal Health) for superovulation, then were mated with ICR male mice. Two-  
344 cell stage zygotes were collected from female oviducts 42–46 h after hCG injection using  
345 the flush-out method. The collected two-cell stage embryos were incubated in KSOM  
346 medium at 37 °C under 5% CO<sub>2</sub> conditions until use.

### 347 **Construction of the plasmid vector and design of sgRNA**

348 Oligo DNAs of the target sequence were ligated into the BbsI site of the pSpCas9(BB)-  
349 2A-Puro (pX459) V2.0 plasmids (Addgene #62988). The combination of #1 and #2 or #3  
350 and #4 oligos was used to establish Fgf10-KO ESCs, and the combination of #8 and #9  
351 or #10 and #11 oligos was used to establish Fgfr2b-KO ESCs (Supplementary Table1).

352 All oligonucleotides were designed using the CrisprDirect website to identify specific  
353 target sites.

354

### 355 **Establishment of Fgf10-KO and Fgfr2b-KO ESC lines**

356 Fgf10 or Fgfr2b-KO ESCs were established using the R01-09 ESC line, which was newly  
357 established from 129X1 and R01 F1 embryos. R01 mouse lines were established through  
358 the tetraploid complementation method from R01 ESCs obtained from Dr. Masahito  
359 Ikawa, established from 129 and BDF1 F1 embryos and constitutively expressing RFP  
360 by the CAG-Su9-DsRed2 transgene, which localizes to the mitochondria. R01-09 ESCs  
361 were seeded on mouse embryonic fibroblasts (MEFs) and then transfected with the two  
362 designed plasmids using Lipofectamine 3000 (Thermo Fisher Scientific). Transfected  
363 cells were selected by transient treatment with 1 µg/ml puromycin for 2 days, and then  
364 ESC colonies were subjected to genotyping with PCR and sequencing. ESCs were  
365 cultured on gelatin-coated dishes, and MEFs with N2B27 medium supplemented with 3  
366 µM CHIR99021 (Axon; 1386), 1.5 µM CGP77675 (Sigma; SML0314), and mouse LIF  
367 (leukemia inhibitory factor) (N2B27-a2i/L medium)<sup>43</sup>.

368

### 369 **Genotyping**

370 Genotyping primers for detecting Fgf10-KO and Fgfr2b-KO ESCs are shown in Table S1.  
371 DNA fragments were amplified using GoTaq (Promega) for 40 cycles to detect null or  
372 WT alleles under the following conditions: 94°C for 30 s, 60°C for 30 s and 72°C for 60  
373 s.

374

### 375 **Flow cytometry analysis and fluorescence-assisted cell sorting**

376 All chimeric embryos were recovered at the E14.5 stage. Tail, kidney, lung, stomach, and  
377 intestine samples were incubated with 0.25% trypsin for 10 min at 37°C. After pipetting  
378 to dissociate the tissue, 10% FBS in PBS was added, and samples were filtered through a  
379 37 µm mesh. The FL3 detector on Accuri (BD Bioscience) was used to detect RFP+  
380 populations. Tail samples were used to estimate chimerism on Fgf10-KO or Fgfr2b-KO  
381 chimera. SH800SFP (SONY) was used to sort between the RFP+ and RFP-  
382 subpopulations.

383

### 384 **RNA expression analysis**

385 Total RNA was purified using Trizol reagent (Thermo Fisher Scientific) and used for  
386 reverse transcription. cDNA was prepared using the SuperScript IV VILO master mix

387 (Thermo Fisher Scientific). RT (reverse transcription) PCR was performed using GoTaq  
388 (Promega). For quantitative RT-PCR analysis, Luna Universal qPCR Master Mix (NEB)  
389 was used to amplify the DNA fragment, and amplified DNA was detected on a  
390 LightCycler 96 (Roche). The primers used for RT-PCR are described in Supplementary  
391 Table2.

392

### 393 **Tetraploid complementation and rat ESC injection**

394 Tetraploid embryos were prepared as described previously<sup>44, 45</sup>. In brief, ICR two-cell  
395 stage embryos were placed in fusion buffer, and electrofusion was performed using  
396 CFB16-HB and LF501PT1-10 electrodes (BEXCo.Ltd.). Tetraploid embryos were  
397 incubated in KSOM at 37°C under 5% CO<sub>2</sub> until use. 6-8 cells of Fgfr2b-KO ESCs were  
398 injected into tetraploid embryos at E2.5. These embryos were cultured to the E3.5 stage  
399 and injected into 6-8 cells of GFP-expressing rat ESCs (rG104)<sup>46</sup>, followed by transfer  
400 into the uterus of E2.5 pseudopregnant ICR mice. The fetuses were recovered and  
401 dissected at E14.5, and offspring were recovered at E19.5 via Caesarean section. The  
402 ESC-derived offspring were analysis using RFP or GFP signal under fluorescence stereo  
403 microscope (MZ FLIII; Leica).

404

### 405 **Immunocytochemistry and HE staining**

406 The lungs at E14.5 or E19.5 were fixed with 4% paraformaldehyde (PFA) in phosphate  
407 buffered saline (PBS) (-) (Nacalai) for 15 min at 25 °C or overnight at 4 °C. After washing  
408 with PBS, the lungs were immersed in 10, 20, and 30% sucrose. The treated lungs were  
409 then sunk into Tissue-TeK O.C.T compound (Sakura Finetek). After making sections with  
410 a cryostat (NX70; Leica) at 10 μm, the slides were dried at 25 °C, followed by washing  
411 with PBS (-). Slides were immersed in EtOH and 4% PFA solution (1:1) for 15 s and  
412 washed with ddH<sub>2</sub>O, then treated with Mayer's hematoxylin solution (WAKO) for 1 min  
413 and washed with PBS (-) and ddH<sub>2</sub>O. Next, slides were immersed in 0.5% eosin solution  
414 (WAKO) for 1 min and washed three times with 100% EtOH, then twice more in xylene.  
415 Mountquick (DAIDO SANGYO) was added to the slides and samples were covered with  
416 cover glass. The sections were observed under a microscope with 10x objective lens  
417 (BX60; Olympus). For immunostaining, slides were treated with 1% bovine serum  
418 albumin (BSA) (Sigma) for 60 min at 25 °C. The primary antibody was incubated  
419 overnight at 4 °C. The slides were then washed three times for 5 min with PBS (-) and  
420 incubated with the secondary antibody for 1 h at 25 °C. After washing three times for 5  
421 min with PBS (-) at 25 °C, the nuclei were stained with Hoechst33342 (Dojindo, KV072)

422 and diluted to 1:1000 in PBS for 30 min at 25 °C before a final PBS (-) wash. The  
423 antibodies used included: rabbit anti-E-Cadherin (Cell Signaling; #3195), rat anti-E-  
424 Cadherin (TAKARA; M110), rat anti-Endomucin (Santa Cruz; sc-65495), mouse anti-  
425 SMA (Biolegend; 904601), rabbit anti-Sox9 (Millipore; AB5535), goat Alexa Fluor 488  
426 anti-rabbit IgG (Thermo Fisher Scientific; A11017), goat Alexa Fluor 647 anti-rabbit IgG  
427 (Thermo Fisher Scientific; A21246), goat Alexa Fluor 488 anti-mouse IgG (Thermo  
428 Fisher Scientific; A11017), goat Alexa Fluor 647 anti-mouse IgG (Thermo Fisher  
429 Scientific; A21237), goat Alexa488 Fluor anti-rat IgG (Thermo Fisher Scientific;  
430 A11006), and goat Alexa647 Fluor anti-rat IgG (Thermo Fisher Scientific; A21247).  
431 Immunostained samples were examined using a laser confocal microscope (LSM700,  
432 LSM710, LSM980; Zeiss).

433

#### 434 **Air space measurement**

435 The air area fraction at E19.5 was measured from lung sections stained with hematoxylin  
436 and eosin. More than three non-overlapping fields (x10 objective lens) from each lung  
437 sample were analyzed. The percentage of air space in the total distal lung area was  
438 analyzed using the ImageJ software.

439

#### 440 **Statistical analysis**

441 For air space measurement, all values are expressed as mean  $\pm$  standard deviation from  
442 at least three different regions in each sample. For quantitative RT-PCR data expressed as  
443 relative fold changes, all values are expressed as mean  $\pm$  standard deviation from at least  
444 triplicate experiments. Student's *t*-test for unpaired comparisons was performed and  
445 differences were considered significant when  $p < 0.01$ .

446

#### 447 **Acknowledgements**

448 We thank Dr. Ikawa (Osaka University) for kindly providing R01 ESCs. We also would  
449 like to thank Editage ([www.editage.com](http://www.editage.com)) for English language editing. This work was  
450 supported by JSPS KAKENHI Grant Number (16K07091 and 18H04885) to A.I. and  
451 (17H06868 and 18K06031) to S.Y., Start Up Fund for female researchers in NAIST to  
452 A.I., KAC 40th Anniversary Research Grant to A.I., The NOVARTIS Foundation (Japan)  
453 for the Promotion of Science to A.I., Next Generation Interdisciplinary Research Project  
454 to A.I., and The foundation for Nara Institute of Science and Technology to S.Y.

455

## 456 **Author contributions**

457 S.Y. and A.I. designed the study. S.Y. wrote the manuscript with help of A.I. S.Y. and Y.M.  
458 performed embryo manipulation, analyzed the chimeras, performed molecular biological  
459 analysis and cell culture. S.Y. and A.I supervised the project.  
460

## 461 **Competing interests**

462 The authors declare that they have no competing interests.

463 Additional information

464 Correspondence and requests for materials should be addressed to S.Y. or A.I.

465 All data needed to evaluate the conclusions in the paper are presented in the paper and/or  
466 the Supplementary information.

## 467 **References**

- 468 1. WHO data on 21 June 2021. [https://www.who.int/news-room/fact-](https://www.who.int/news-room/fact-sheets/detail/chronic-obstructive-pulmonary-disease-(copd))  
469 [sheets/detail/chronic-obstructive-pulmonary-disease-\(copd\)](https://www.who.int/news-room/fact-sheets/detail/chronic-obstructive-pulmonary-disease-(copd))  
470
- 471 2. Valapour, M. et al. OPTN/SRTR 2019 Annual Data Report: Lung. *Am. J.*  
472 *Transplant.* 21, 441-520 (2021).  
473
- 474 3. Ott, H. C. et al. Regeneration and orthotopic transplantation of a bioartificial lung.  
475 *Nat. Med.* 16, 927-933 (2010).  
476
- 477 4. Petersen, T. H. et al. Tissue-Engineered Lungs for in Vivo Implantation. *Science*  
478 329, 538-541 (2010).  
479
- 480 5. Ghaedi, M. et al. Bioengineered lungs generated from human iPSCs-derived  
481 epithelial cells on native extracellular matrix. *J. Tissue Eng. Regen. Med.* 12, e1623-  
482 e1635 (2018).  
483
- 484 6. Stahl, E. C. et al. Evaluation of the host immune response to decellularized lung  
485 scaffolds derived from alpha-Gal knockout pigs in a non-human primate model.  
486 *Biomaterials* 187, 93-104 (2018).  
487



- 488 7. Herriges, M. & Morrisey, E. E. Lung development: orchestrating the generation and  
489 regeneration of a complex organ. *Development* 141, 502-513 (2014).  
490
- 491 8. Loering, S., Cameron, G. J. M., Starkey, M. R. & Hansbro, P. M. Lung development  
492 and emerging roles for type 2 immunity. *J. Pathol.* 247, 686-696 (2019).  
493
- 494 9. Sekine, K. et al. Fgf10 is essential for limb and lung formation. *Nat. Genet.* 21, 138-  
495 141 (1999).  
496
- 497 10. Yuan, T., Volckaert, T., Chanda, D., Thannickal, V. J. & De Langhe, S. P. Fgf10  
498 Signaling in Lung Development, Homeostasis, Disease, and Repair After Injury. *Front.*  
499 *Genet.* 9, 418 (2018)  
500
- 501 11. Ohuchi, H. et al. FGF10 acts as a major ligand for FGF receptor 2 IIIb in mouse  
502 multi-organ development. *Biochem. Biophys. Res. Commun.* 277, 643-649 (2000).  
503
- 504 12. De Moerlooze, L. et al. An important role for the IIIb isoform of fibroblast growth  
505 factor receptor 2 (FGFR2) in mesenchymal-epithelial signalling during mouse  
506 organogenesis. *Development* 127, 483-492 (2000).  
507
- 508 13. Isotani, A., Hatayama, H., Kaseda, K., Ikawa, M. & Okabe, M. Formation of a  
509 thymus from rat ES cells in xenogeneic nude mouse <-> rat ES chimeras. *Genes Cells* 16,  
510 397-405 (2011).  
511
- 512 14. Kobayashi, T. et al. Generation of Rat Pancreas in Mouse by Interspecific Blastocyst  
513 Injection of Pluripotent Stem Cells. *Cell* 142, 787-799 (2010).  
514
- 515 15. Goto, T. et al. Generation of pluripotent stem cell-derived mouse kidneys in Sall1-  
516 targeted anephric rats. *Nat. Commun.* 10, 451 (2019).  
517
- 518 16. Usui, J. et al. Generation of Kidney from Pluripotent Stem Cells via Blastocyst  
519 Complementation. *Am. J. Pathol.* 180, 2417-2426 (2012).  
520
- 521 17. Kitahara, A. et al. Generation of Lungs by Blastocyst Complementation in  
522 Apneumic Fgf10-Deficient Mice. *Cell Rep.* 31, 107626 (2020).  
523

- 524 18. Mori, M. et al. Generation of functional lungs via conditional blastocyst  
525 complementation using pluripotent stem cells. *Nat. Med.* 25, 1691-1698 (2019).  
526
- 527 19. Yamaguchi, T. et al. Interspecies organogenesis generates autologous functional  
528 islets. *Nature* 542, 191-196 (2017).  
529
- 530 20. Chang, A. N. et al. Neural blastocyst complementation enables mouse forebrain  
531 organogenesis. *Nature* 563, 126-130 (2018).  
532
- 533 21. Hamanaka, S. et al. Generation of Vascular Endothelial Cells and Hematopoietic  
534 Cells by Blastocyst Complementation. *Stem Cell Reports* 11, 988-997 (2018).  
535
- 536 22. Ruiz-Estevez, M. et al. Liver development is restored by blastocyst  
537 complementation of HHEX knockout in mice and pigs. *Stem Cell Res. Ther.* 12, 292  
538 (2021).  
539
- 540 23. Kobayashi, T., Kato-Itoh, M. & Nakauchi, H. Targeted Organ Generation Using  
541 Mixl1-Inducible Mouse Pluripotent Stem Cells in Blastocyst Complementation. *Stem*  
542 *Cells Dev.* 24, 182-189 (2015).  
543
- 544 24. Yamaguchi, T. et al. An interspecies barrier to tetraploid complementation and  
545 chimera formation. *Sci. Rep.* 8, 15289 (2018).  
546
- 547 25. Liu, Y. & Hogan, B. L. Differential gene expression in the distal tip endoderm of  
548 the embryonic mouse lung. *Gene Expr. Patterns* 2, 229-233 (2002)  
549
- 550 26. Okubo, T., Knoepfler, P. S., Eisenman, R. N. & Hogan, B. L. Nmyc plays an  
551 essential role during lung development as a dosage-sensitive regulator of progenitor cell  
552 proliferation and differentiation. *Development* 132, 1363-1374 (2005).  
553
- 554 27. Porter, F. D. et al. Lhx2, a LIM homeobox gene, is required for eye, forebrain, and  
555 definitive erythrocyte development. *Development* 124, 2935-2944 (1997).  
556
- 557 28. Shawlot, W. et al. Lim1 is required in both primitive streak-derived tissues and  
558 visceral endoderm for head formation in the mouse. *Development* 126, 4925-4932 (1999).  
559

- 560 29. Tremblay, K. D., Hoodless, P. A., Bikoff, E. K. & Robertson, E. J. Formation of the  
561 definitive endoderm in mouse is a Smad2-dependent process. *Development* 127, 3079-  
562 3090 (2000).
- 563
- 564 30. Kanai-Azuma, M. et al. Depletion of definitive gut endoderm in Sox17-null mutant  
565 mice. *Development* 129, 2367-2379 (2002).
- 566
- 567 31. Oji, A. et al. CRISPR/Cas9 mediated genome editing in ES cells and its application  
568 for chimeric analysis in mice. *Sci. Rep.* 6, 31666 (2016).
- 569
- 570 32. Al Alam, D. et al. Evidence for the involvement of fibroblast growth factor 10 in  
571 lipofibroblast formation during embryonic lung development. *Development* 142, 4139-  
572 4150 (2015).
- 573
- 574 33. Okumura, H. et al. Contribution of rat embryonic stem cells to xenogeneic chimeras  
575 in blastocyst or 8-cell embryo injection and aggregation. *Xenotransplantation* 26, e12468  
576 (2019).
- 577
- 578 34. Sui, P. et al. E3 ubiquitin ligase MDM2 acts through p53 to control respiratory  
579 progenitor cell number and lung size. *Development* 146, dev179820 (2019).
- 580
- 581 35. Franca, L. R., Ogawa, T., Avarbock, M. R., Brinster, R. L. & Russell, L. D. Germ  
582 cell genotype controls cell cycle during spermatogenesis in the rat. *Biol. Reprod.* 59,  
583 1371-1377 (1998).
- 584
- 585 36. Rockich, B. E. et al. Spence, Sox9 plays multiple roles in the lung epithelium during  
586 branching morphogenesis. *Proc. Natl. Acad. Sci. U.S.A.* 110, E4456-E4464 (2013).
- 587
- 588 37. Moon, S. et al. Asxl1 exerts an antiproliferative effect on mouse lung maturation  
589 via epigenetic repression of the E2f1-Nmyc axis. *Cell Death Dis.* 9, 1118 (2018).
- 590
- 591 38. Bird, A. D. et al. cAMP Response Element Binding Protein Is Required for  
592 Differentiation of Respiratory Epithelium during Murine Development. *PLOS ONE* 6,  
593 e17843 (2011).
- 594
- 595 39. Kersbergen, A. et al. Lung morphogenesis is orchestrated through Grainyhead-like

- 596 2 (*Grhl2*) transcriptional programs. *Dev. Biol.* 443, 1-9 (2018).  
597
- 598 40. O'Brien, K. B. et al. CARM1 is required for proper control of proliferation and  
599 differentiation of pulmonary epithelial cells. *Development* 137, 2147-2156 (2010).  
600
- 601 41. Kalin, T. V. et al. Forkhead Box m1 transcription factor is required for perinatal lung  
602 function. *Proc. Natl. Acad. Sci. U.S.A.* 105, 19330-19335 (2008).  
603
- 604 42. Kilkenny, C., Browne, W. J., Cuthill, I. C., Emerson, M. & Altman, D. G. Improving  
605 Bioscience Research Reporting: The ARRIVE Guidelines for Reporting Animal  
606 Research. *PLOS Biol.* 8, e1000412 (2010).  
607
- 608 43. Choi, J. et al. Prolonged *Mek1/2* suppression impairs the developmental potential  
609 of embryonic stem cells. *Nature* 548, 219-223 (2017).  
610
- 611 44. Okada, Y. et al. Complementation of placental defects and embryonic lethality by  
612 trophoblast-specific lentiviral gene transfer. *Nat. Biotechnol.* 25, 233-237 (2007).  
613
- 614 45. Kishimoto, Y. et al. A novel tissue specific alternative splicing variant mitigates  
615 phenotypes in *Ets2* frame-shift mutant models. *Sci. Rep.* 11, 8297 (2021).  
616
- 617 46. Isotani, A., Yamagata, K., Okabe, M. & Ikawa, M. Generation of *Hprt*-disrupted rat  
618 through mouse  $\leftarrow$  rat ES chimeras. *Sci. Rep.* 6, 24215 (2016).  
619

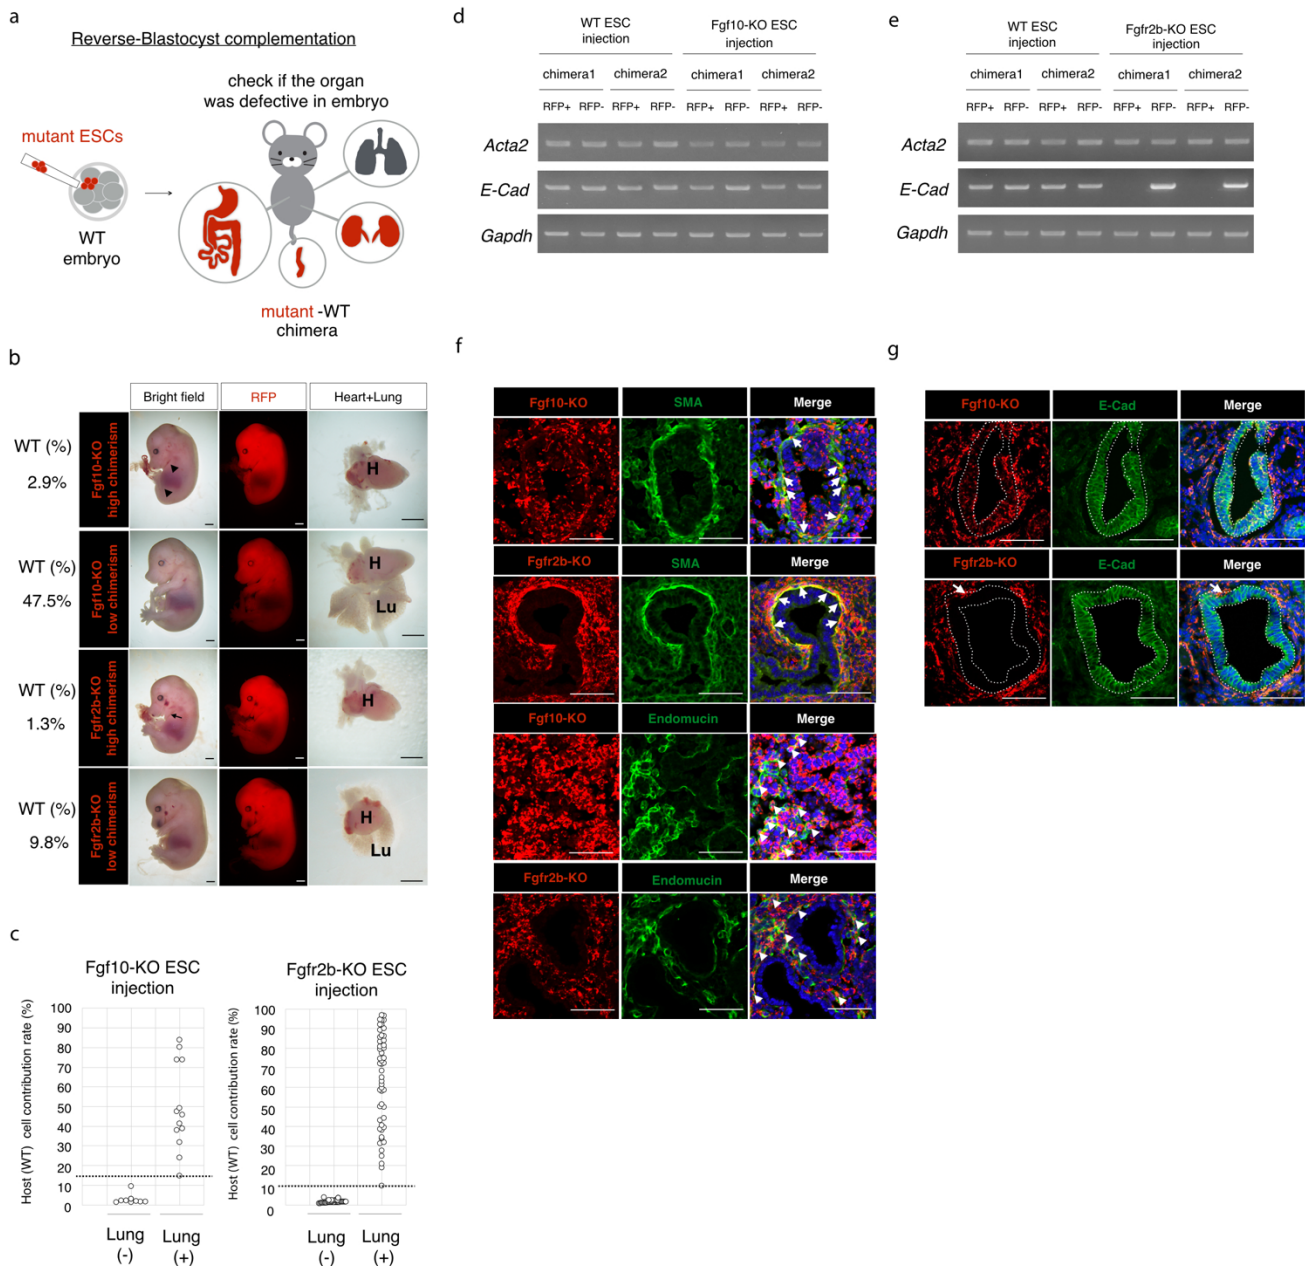

620 **Fig. 1 Analysis of Fgf10-KO and Fgfr2b-KO models in lung with reverse-blastocyst**  
 621 **complementation.**

622 **a** Schematic of reverse-blastocyst complementation. Mutant embryonic stem cells (ESCs)  
 623 expressing red fluorescent protein (RFP) were injected into the wild type (WT) embryo.  
 624 Obtained chimeras derived from mutant and WT cells were dissected to determine  
 625 whether target organ was present.

626 **b** Chimeric embryos derived from Fgf10-knockout (KO) and WT cells or Fgfr2b-KO and  
 627 WT cells. Chimera with higher contribution of Fgf10-KO cells showed forelimb,

628 hindlimb (black arrowhead), and lung defects. Chimera with higher contribution of  
629 Fgfr2b-KO cells showed forelimb (black arrow) and lung defect. H: heart, Lu: lung. Scale  
630 bars, 1 mm.

631 **c** Relationship between the cellular contribution rate of the host (WT) cells and the  
632 presence of the lung for WT embryos with Fgf10-KO or Fgfr2b-KO ESCs.

633 **d** Gene expressions of *Acta2*, *E-Cad* or *Gapdh*. RFP<sup>+</sup> or RFP<sup>-</sup> cells were sorted from  
634 lungs of Fgf10-KO ESCs and WT cell or WT ESCs and WT cell chimeras.

635 **e** Gene expressions of *Acta2*, *E-Cad* or *Gapdh*. RFP<sup>+</sup> or RFP<sup>-</sup> cells were sorted from  
636 lungs of Fgfr2b-KO ESCs and WT cell or WT ESCs and WT cell chimeras.

637 **f** Immunostaining of SMA, Endomucin in lung of Fgf10-KO and WT cell or Fgfr2b-KO  
638 and WT cell chimeras. White arrows or arrowheads indicate that Fgf10-KO or Fgfr2b-  
639 KO cells localized at SMA- or Endomucin-positive cells, respectively. Scale bars, 50  $\mu$ m.

640 **g** Immunostaining of E-Cadherin in lung of Fgf10-KO and WT cell or Fgfr2b-KO and  
641 WT cell chimeras. White arrow indicates that Fgfr2b-KO cells localized at E-Cad positive  
642 cells. Scale bars, 50  $\mu$ m.

643

644

645

646

647

648

649

650

651

652

653

654

655

656

657

658

659

660

661

662

663



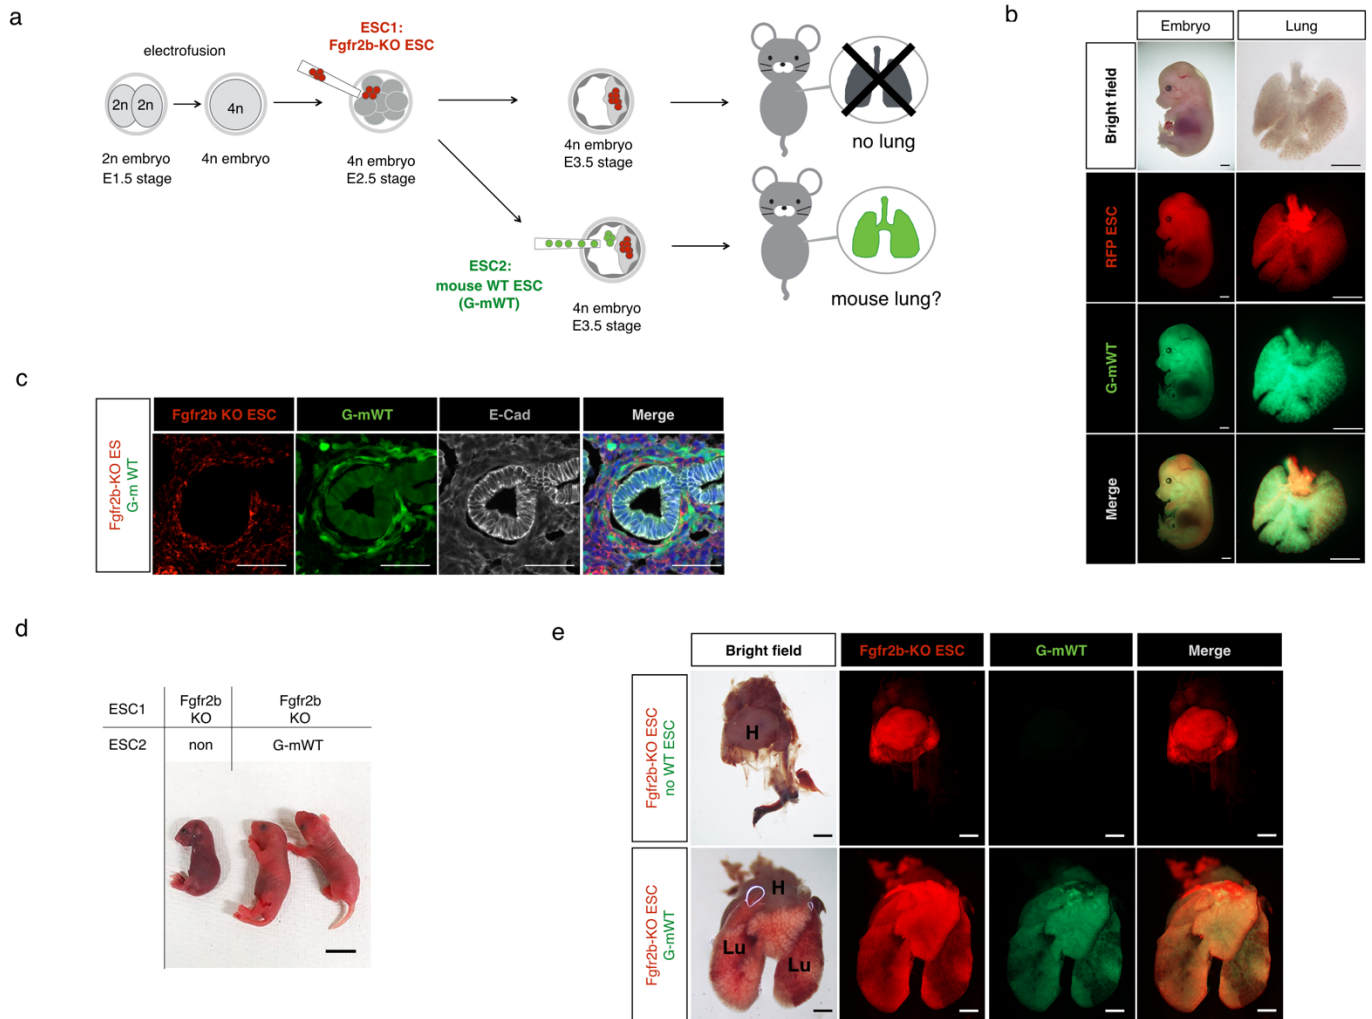

664

665 **Fig. 2 Generation of mouse ESC-derived lung in Fgfr2b-KO model with tetraploid-**  
 666 **based organ complementation method.**

667 **a** Schematic for producing chimeras from Fgfr2b-knockout (KO) and mouse wild type  
 668 (WT) ESCs. Two cell-stage embryos were electrically fused to produce a 4n embryo.  
 669 Fgfr2b-KO ESCs were injected at the E2.5 stage, followed by GFP-expressing mouse  
 670 WT (G-mWT) ESCs at the E3.5 stage. Without G-mWT ESC injection, lung agenesis  
 671 was theoretically observed (upper panel), then examined to determine whether G-mWT  
 672 ESCs overcame lung agenesis (lower panel).

673 **b** Embryo and lung derived from red fluorescent protein (RFP)-expressing Fgfr2b-KO  
 674 ESCs and G-mWT ESCs chimera. Scale bars, 500  $\mu$ m.

675 **c** Immunostaining of E-Cad in lung derived from Fgfr2b-KO ESCs and G-mWT ESCs  
 676 chimera. Note that lung epithelial cells were composed by GFP-expressing mouse WT  
 677 cells. Scale bars, 50  $\mu$ m.

678 **d** Neonates from obtained chimeras. No WT ESC-contributed pups showed cyanosis.

679 Scale bars, 1 cm.

680 **e** GFP and RFP images of isolated heart and lungs from Fgfr2b-KO only and Fgfr2b-KO

681 and G-mWT ESC chimeras at P0. (H: heart, Lu: lung) Scale bars, 1 mm.

682

683

684

685

686

687

688

689

690

691

692

693

694

695

696

697

698

699

700

701

702

703

704

705

706

707

708

709

710

711

712

713

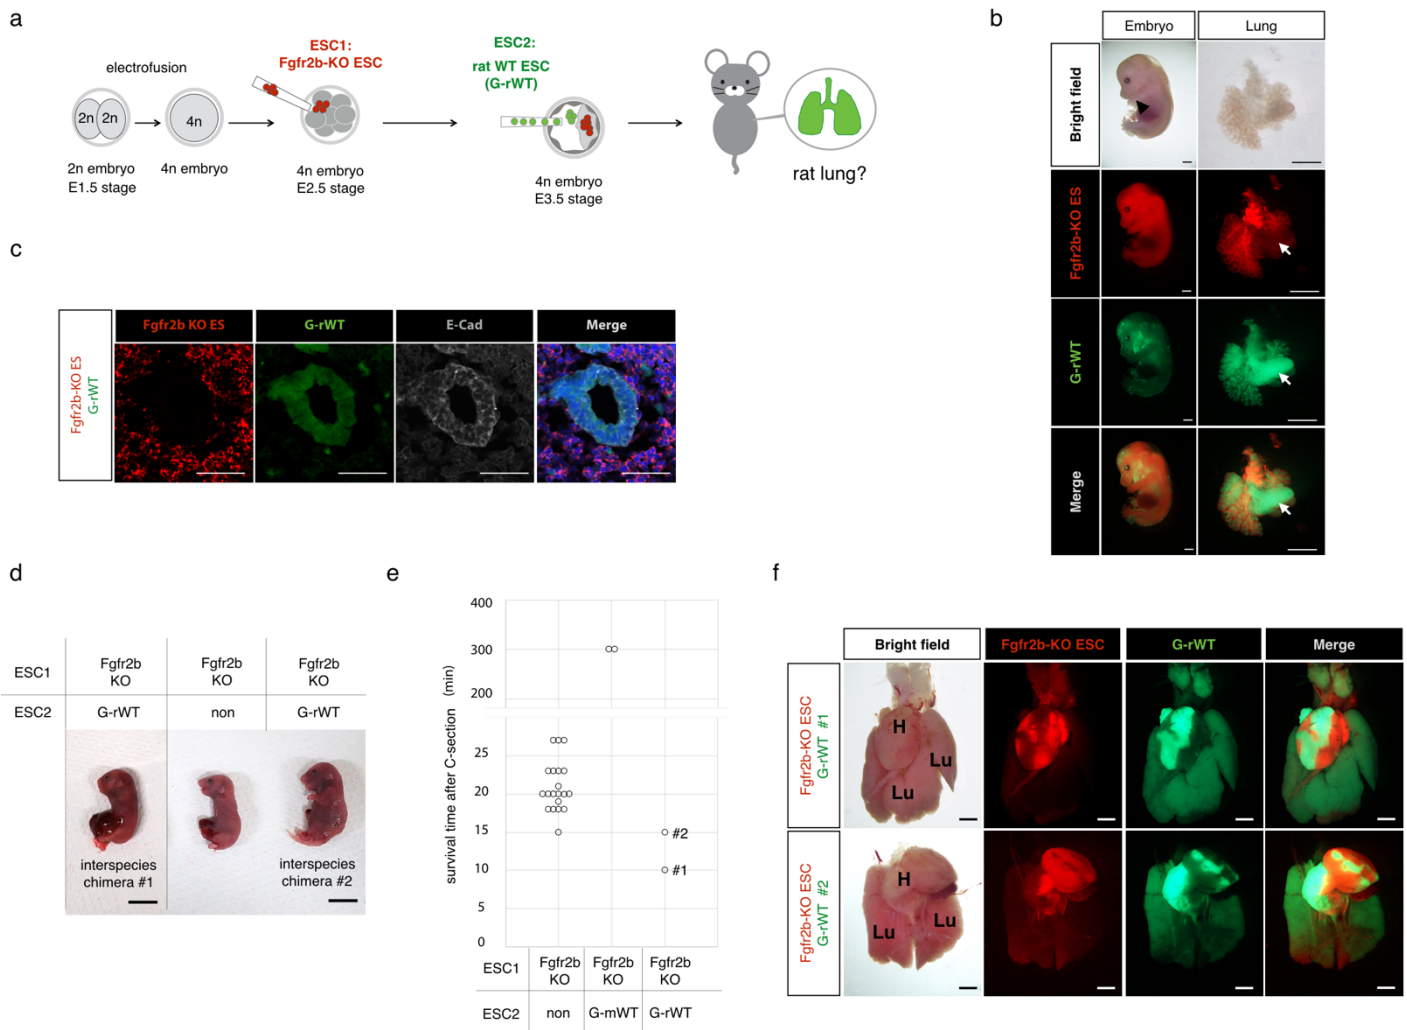

714

715 **Fig. 3 Generation of rat ESC-derived lungs in Fgfr2b-KO model with tetraploid-**  
 716 **based organ complementation method.**

717 **a** Schematic for producing chimeras from Fgfr2b-knockout (KO) ESCs and rat wild type  
 718 (WT) ESCs. Two cell-stage embryos were electrically fused to produce a 4n embryo.  
 719 Fgfr2b-KO ESCs were injected at the E2.5 stage, followed by GFP-expressing rat WT  
 720 (G-rWT) ESCs at the E3.5 stage.

721 **b** Embryo and lung derived from Fgfr2b-KO and G-rWT ESC chimera at E14.5. Chimera  
 722 with G-rWT ESCs have forelimb (black arrowhead) and lung. Note that one of the lung  
 723 lobes was almost fully composed of rat cells (white arrow). Scale bars, 500  $\mu$ m.

724 **c** Immunostaining of E-Cad in lung derived from Fgfr2b-KO and G-rWT ESCs chimera.  
 725 Note that lung epithelial cells were composed of G-rWT cells. Scale bars, 50  $\mu$ m

726 **d** Neonates from obtained chimeras. No WT ESC-contributed pups or G-rWT ESC  
 727 chimeras showed cyanosis. Scale bars, 1 cm

728 **e** Survival time of obtained pups after Caesarian section (C-section) (min).  
729 **f** GFP and RFP images of isolated heart and lungs from Fgfr2b-KO and G-rWT ESC  
730 chimeras (#1, #2) at P0. Note that lung from Fgfr2b-KO and rat ESCs #1 was composed  
731 of almost all rat cells. (H: heart, Lu: lung) Scale bars, 1 mm.

732

733

734

735

736

737

738

739

740

741

742

743

744

745

746

747

748

749

750

751

752

753

754

755

756

757

758

759

760

761

762

763

a

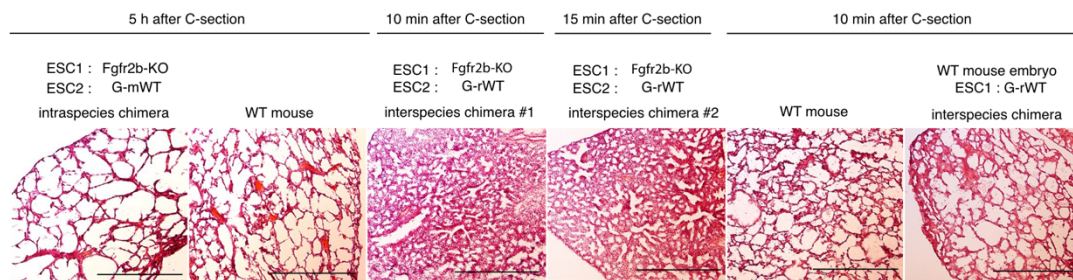

b

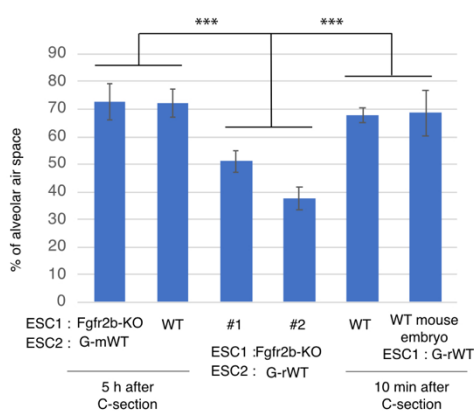

c

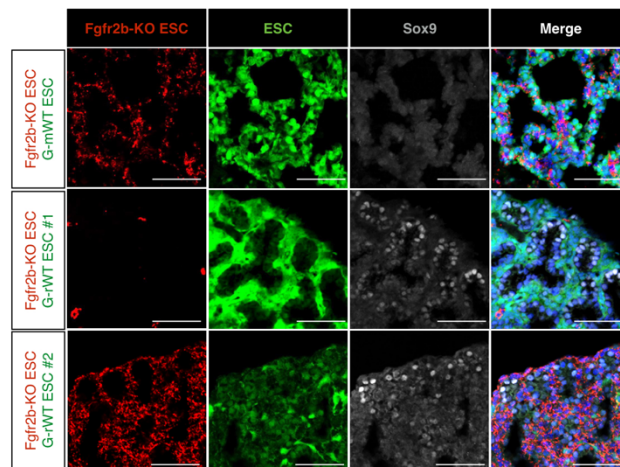

764

765 **Fig. 4 Analysis of rat-derived lung with Fgfr2b-KO model in neonatal stage.**

766 **a** Hematoxylin and Eosin (H&E) stain of the lung sections at P0. Lungs from Fgfr2b-  
 767 knockout (KO) ESC and GFP-expressing mouse WT (G-mWT) ESC chimeras or WT  
 768 mice were dissected 5 h after Caesarian section (C-section). Lungs from Fgfr2b-KO ESC  
 769 and GFP-expressing rat WT (G-rWT) ESC chimeras (#1, #2) were dissected after  
 770 chimeras died (#1: 10 min, #2: 15 min). Lungs from WT mice or WT mouse and G-rWT  
 771 ESC chimeras were dissected 10 min after C-section. Scale bars, 500  $\mu$ m

772 **b** The air space was measured from the obtained lung section in Fig.4a. Numbers indicate  
 773 the percentage of alveolar air space. ( $n=3$  for each). Data are presented as means  $\pm$  S.D.  
 774 from three independent regions. \*\*\*:  $p<0.01$

775 **c** Immunostaining of Sox9 (Gray) in the lungs derived from Fgfr2b-KO ESCs (Red) and  
 776 G-mWT or G-rWT ESC (Green) chimeras. Scale bars, 100  $\mu$ m

777

778

779

780

781 **Table 1. Result of Fgf10-KO ESC injection with reverse-blastocyst complementation**

782

| ESC line      | transplantation | implantation | live embryos | chimera |
|---------------|-----------------|--------------|--------------|---------|
| Fgf10-KO (2E) | 45              | 17           | 17           | 12      |
| Fgf10-KO (7C) | 43              | 24           | 17           | 14      |

783

784 **Table 2. Result of Fgfr2b-KO ESC injection with reverse-blastocyst**  
785 **complementation**

786

| ESC line        | transplantation | implantation | live embryos | chimera |
|-----------------|-----------------|--------------|--------------|---------|
| Fgfr2b-KO (5F)  | 180             | 83           | 59           | 44      |
| Fgfr2b-KO (11D) | 166             | 104          | 87           | 75      |

787

788 **Table 3. Result of Fgfr2b-KO ESC and G-mWT ESC injection with tetraploid**  
789 **complementation at E14.5 and P0**

790

| Stage at dissection | transplantation | implantation | live embryos | chimera |
|---------------------|-----------------|--------------|--------------|---------|
| E14.5               | 48              | 18           | 4            | 2       |
| P0                  | 27              | 5            | 2            | 2       |

791

792 **Table 4. Result of Fgfr2b-KO ESC and G-rWT ESC injection with tetraploid**  
793 **complementation at E14.5 and P0**

794

| Stage at dissection | transplantation | implantation | live embryos | chimera |
|---------------------|-----------------|--------------|--------------|---------|
| E14.5               | 256             | 118          | 18           | 3       |
| P0                  | 386             | 172          | 24           | 2       |

795
